# Supplementary material
Source: publisher figshare collection journal article supplement (https://sage.figshare.com/ndownloader/files/14182703)

**Supplemental Figure**

**Supplemental Figure 1.** Western blot illustrating GLT1 immunoreactivity of the RVM tissues at 30 min-8 week after inflammation. Note that the GLT1 antibody recognized monomer (M), dimer (D) and trimer (T) bands. The GLT1 dimer immunoreactivity was analyzed in the present study. L, protein molecular weight ladder.

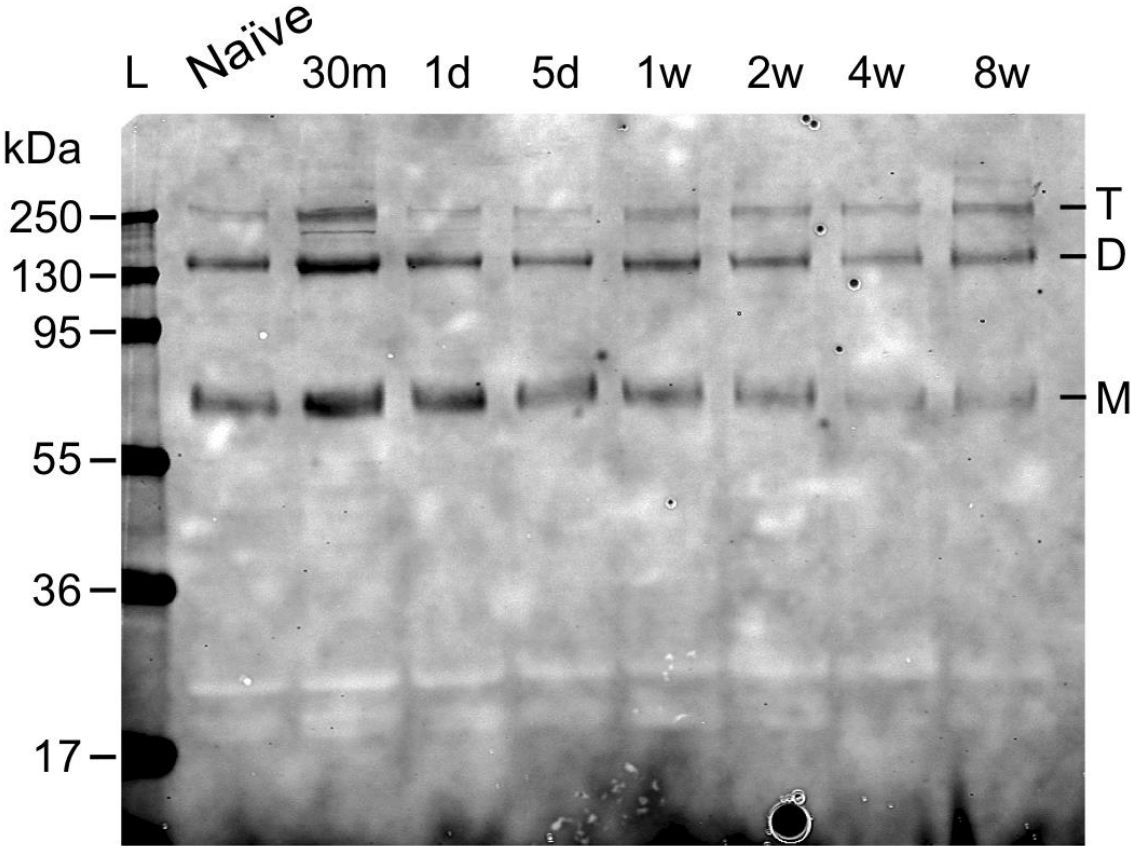

Supplement: Supplementary file 1 [file 14182703]
